# Supplementary material for: Pan-cancer analysis of Methyltransferase-like 16 (METTL16) and validated in colorectal cancer
Source: publisher site journal article supplement (doi:10.18632/aging.206210), 2025-02-27
Supplement: Supplementary file [file aging-v17i2-206210-supplementary-material-SD1.pdf]

# SUPPLEMENTARY FIGURES

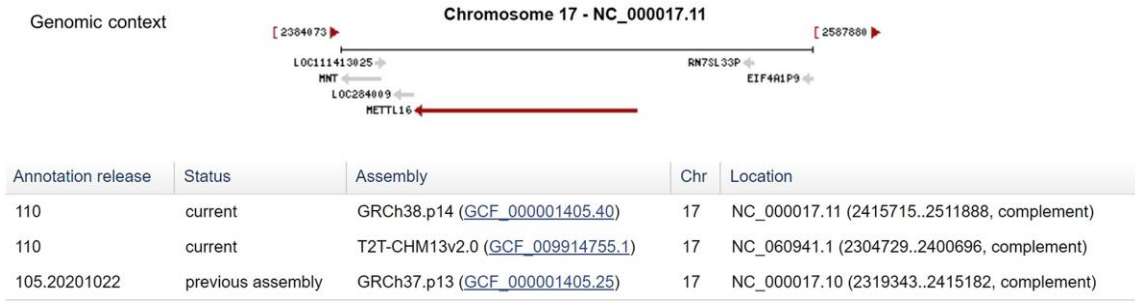

Supplementary Figure 1. Structural characteristics of METTL16.

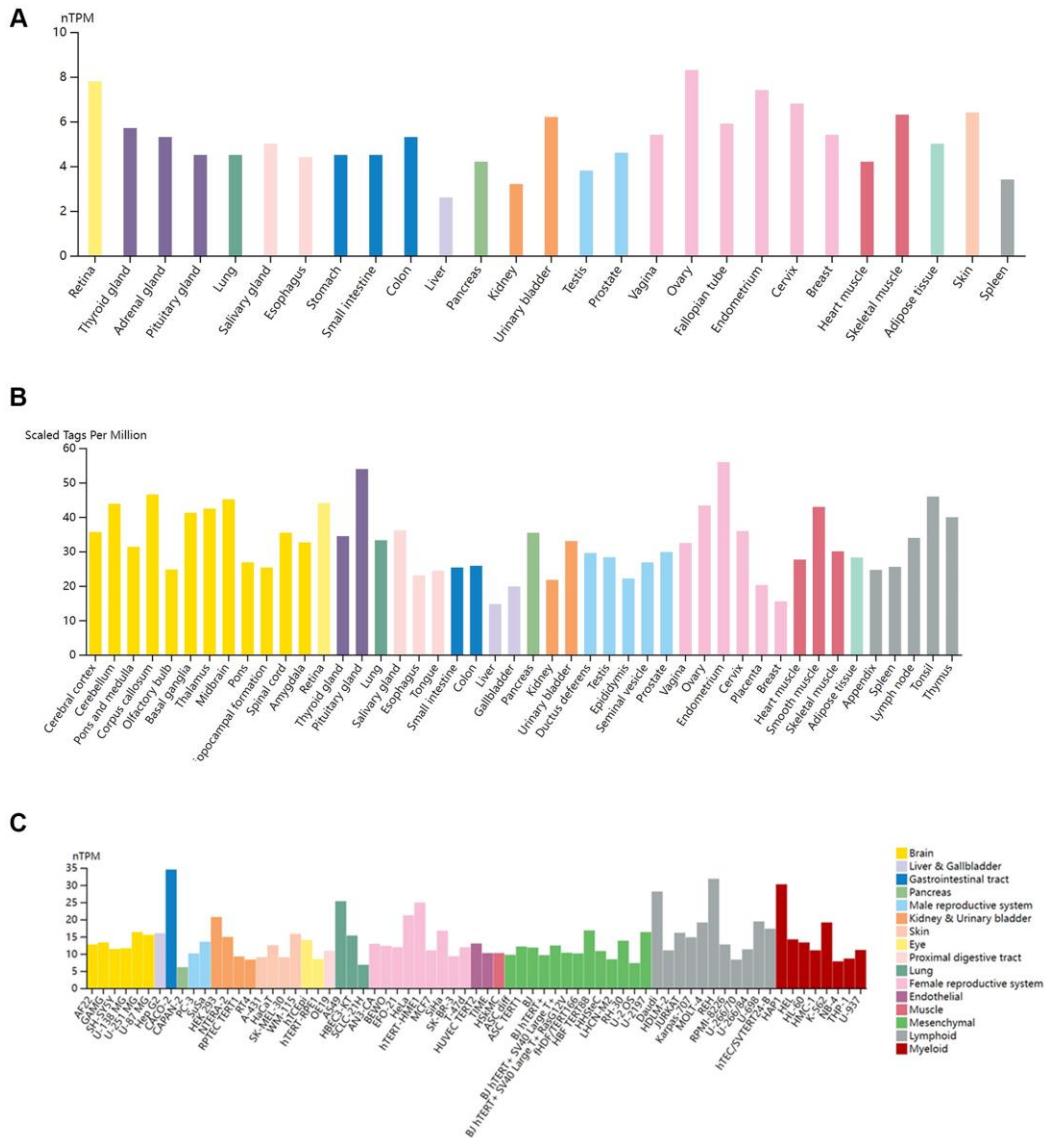

Supplementary Figure 2. Expression level of METTL16 in different cells and tissues. (A) HPA tissue dataset; (B) Tissue consensus dataset; (C) Cell line dataset.

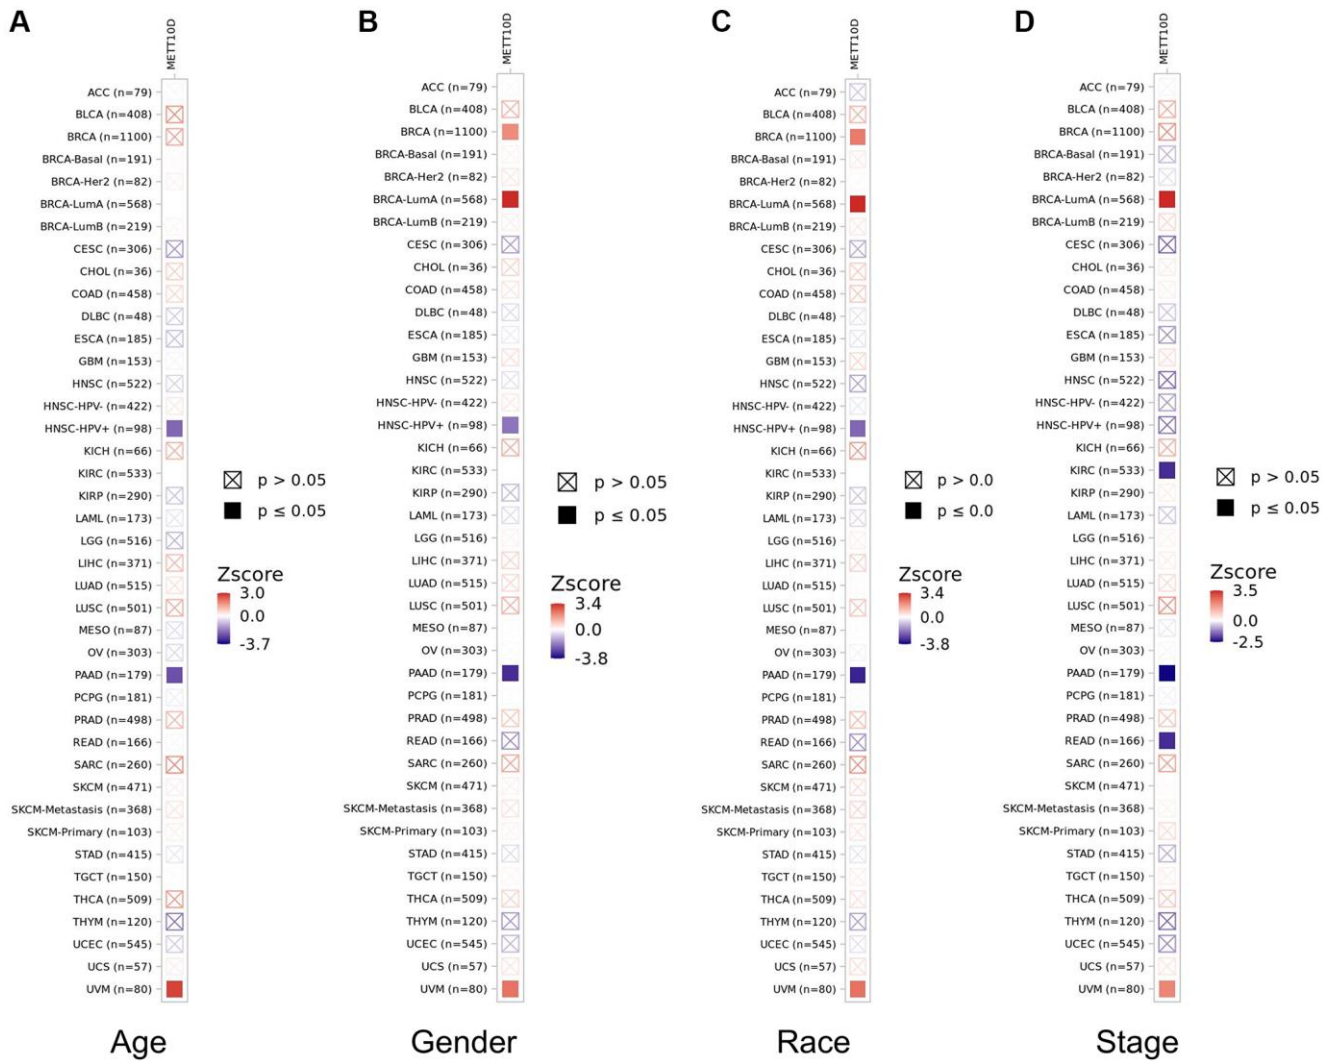

**Supplementary Figure 3.** The relationship between METTL16 gene expression with age (A), gender (B), race (C), and stage (D).

**A**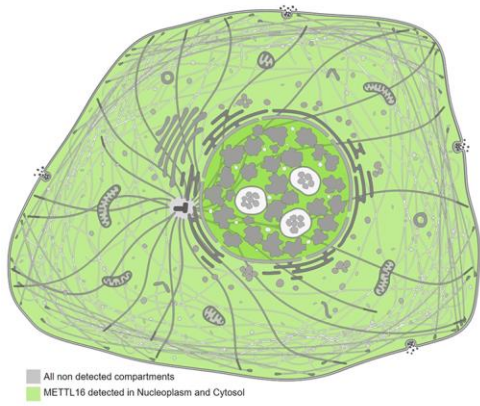**B**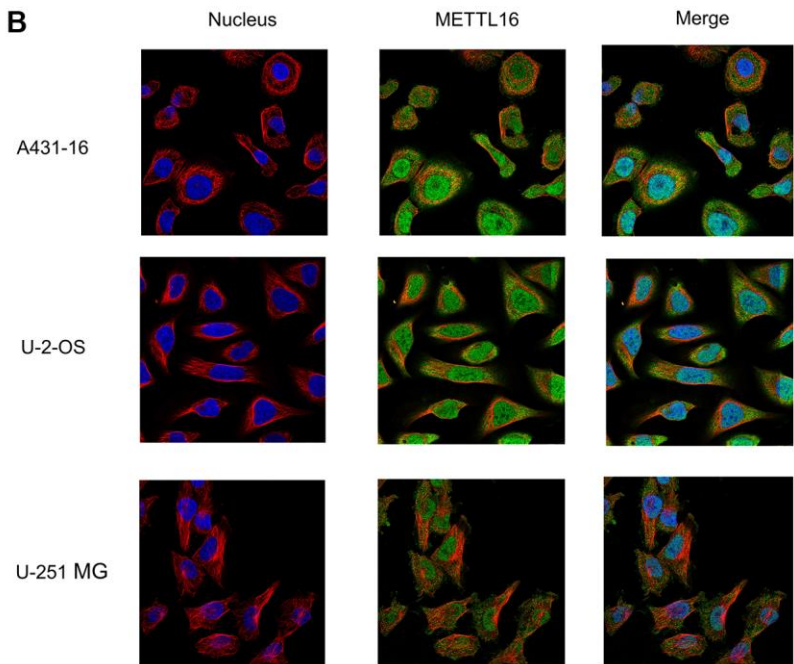

**Supplementary Figure 4.** The subcellular distribution of METTL16 (A) and the nucleus are marked in blue, the METTL16 marked in green, the microtubules are marked in red (B).

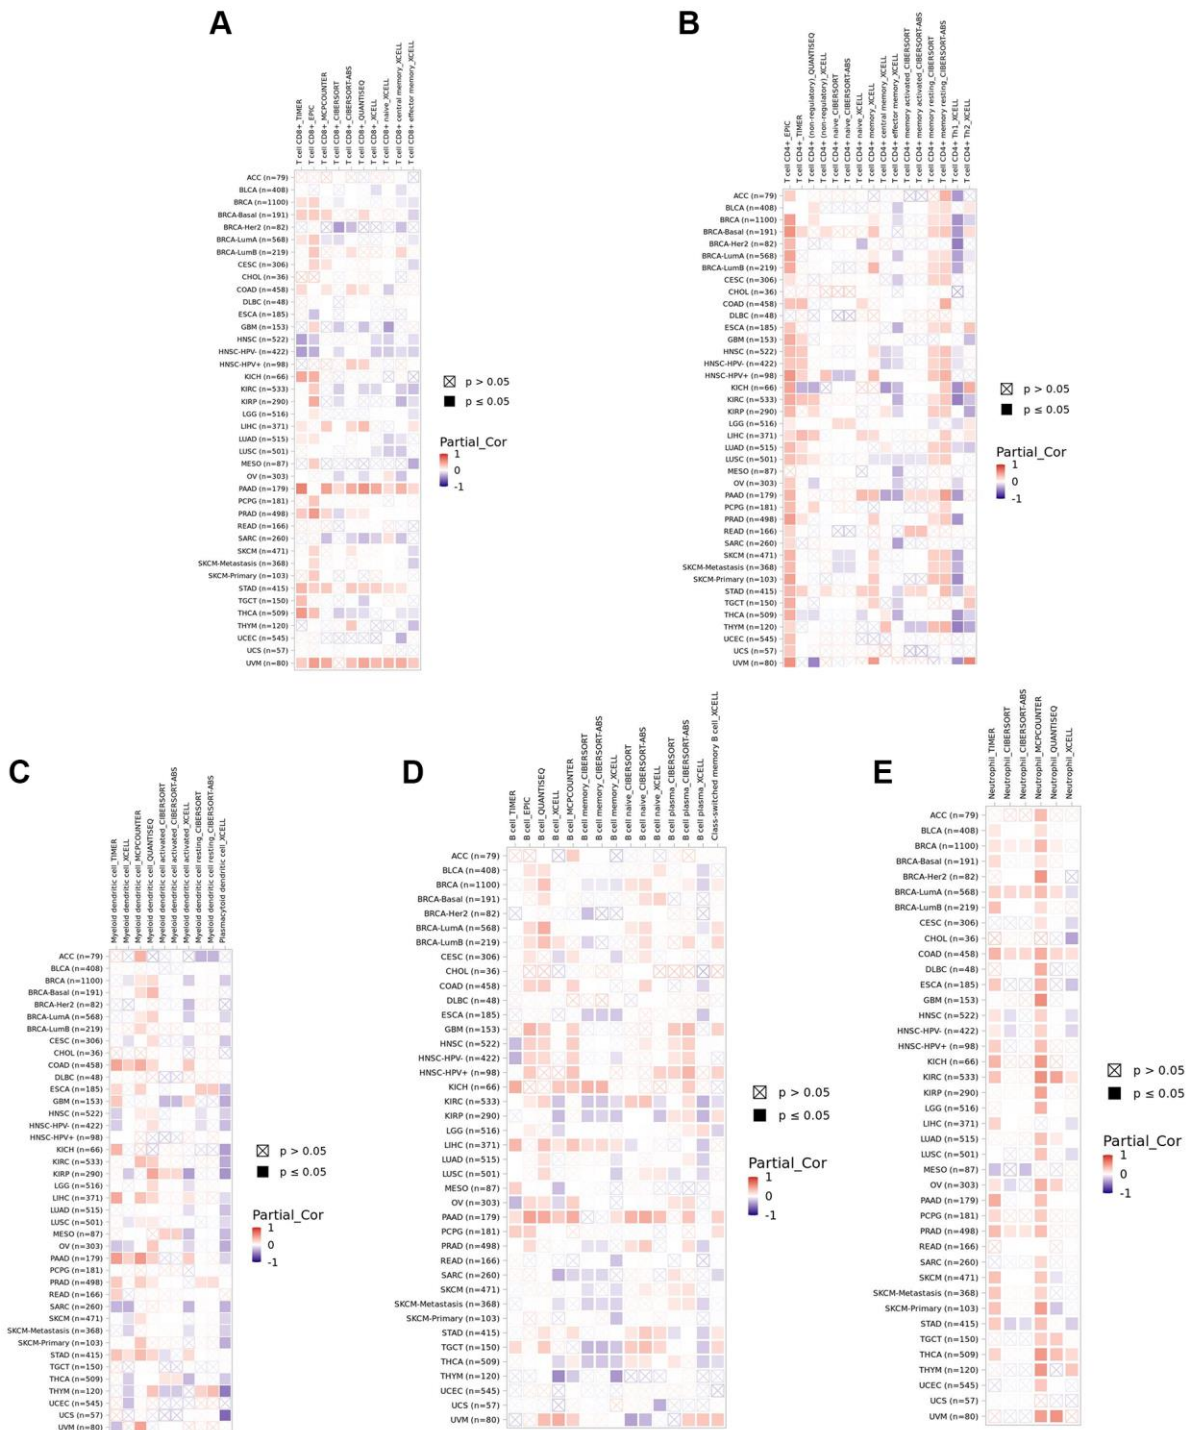

**Supplementary Figure 5.** Correlation analysis between METTL16 expression levels and the expression degree of immune cells, including CD8+ T cell (A), CD4+ T cell (B), Myeloid (C), B cell (D), Neutrophil (E).
